# Supplementary material
Source: PubMed Central journal article supplement (PMC2293262)
Supplement: jbacter_190_8_2822__1.pdf [file jbacter_190_8_2822__1.pdf]

Table 1: Features added to the high density microarray used for transcriptome analysis of *P. putida* S12 strains.

| <b>Feature name</b> | <b>Accession number</b> | <b>Description</b>                                                                 |
|---------------------|-------------------------|------------------------------------------------------------------------------------|
| arpA_s_at           | AF183959.1              | Antibiotic resistance pump, periplasmic linker protein (arpA)                      |
| arpB_at             | AF183959.1              | Antibiotic resistance pump, inner membrane transporter protein (arpB)              |
| arpB_s_at           | AF183959.1              | Antibiotic resistance pump, inner membrane transporter protein (arpB)              |
| arpC_s_at           | AF183959.1              | Antibiotic resistance pump, outer membrane channel protein (arpC)                  |
| arpR_s_at           | AF183959.1              | Antibiotic resistance pump regulator (arpR)                                        |
| nagR_at             | AF036940                | Ralstonia sp. U2 plasmid pWWU2. LysR-like regular protein (nagR)                   |
| neo_at              | U32991.1                | Escherichia coli mini-Tn5 kanamycin transposon; neomycin phosphotransferase        |
| orf1ISS12_at        | AF292393.1              | Pseudomonas putida insertion sequence ISS12, putative transposase subunit 1 (orf1) |
| orf2ISS12_at        | AF292393.1              | Pseudomonas putida insertion sequence ISS12, putative transposase subunit 2 (orf2) |
| pal_at              | X12702                  | R.toruloides mRNA for L-phenylalanine ammonia-lyase (PAL)                          |
| porinS12_at         | AF360363.1              | Pseudomonas putida S12 isolate KL46F8 putative porin gene, complete cds            |
| porinS12_s_at       | AF360363.1              | Pseudomonas putida S12 isolate KL46F8 putative porin gene, complete cds            |
| S12AroP1_at         |                         | Pseudomonas putida S12 genes bottle neck aromatic amino acid synthesis: aroP1      |
| S12AroP1_s_at       |                         | Pseudomonas putida S12 genes bottle neck aromatic amino acid synthesis: aroP1      |
| S12AroP2_s_at       |                         | Pseudomonas putida S12 genes bottle neck aromatic amino acid synthesis: aroP2      |
| S12DAHP1_s_at       |                         | Pseudomonas putida S12 genes bottle neck aromatic amino acid synthesis: dahp(1)    |
| S12DAHP2_s_at       |                         | Pseudomonas putida S12 genes bottle neck aromatic amino acid synthesis: dahp(2)    |
| S12PProt_s_at       |                         | Pseudomonas putida S12 genes bottle neck aromatic amino acid synthesis: P-protein  |
| S12tktA_s_at        |                         | Pseudomonas putida S12 genes bottle neck aromatic amino acid synthesis: tktA       |
| SMOS12_at           | Y13349                  | Pseudomonas putida gene encoding styrene monooxygenase                             |
| srpA_at             | AF029405.1              | Pseudomonas putida solvent transporter, periplasmic linker protein (srpA)          |
| srpB_at             | AF029405.1              | Pseudomonas putida solvent transporter, inner membrane transporter protein (srpB)  |
| srpC_at             | AF029405.1              | Pseudomonas putida solvent transporter, outer membrane channel protein (srpC)      |
| srpR_at             | AF061937.1              | Pseudomonas putida solvent transporter regulator (srpR)                            |

|               |            |                                                                                                    |
|---------------|------------|----------------------------------------------------------------------------------------------------|
| srpS_at       | AF061937.1 | Pseudomonas putida solvent transporter regulator (srpS)                                            |
| todA_at       | J04996.1   | P.putida toluene dioxygenase. Reductase (todB)                                                     |
| todB_at       | J04996.1   | P.putida toluene dioxygenase. Ferredoxin (todB)                                                    |
| todC1_at      | J04996.1   | P.putida toluene dioxygenase. Iron-sulfur protein, large subunit (todC1)                           |
| todC2_at      | J04996.1   | P.putida toluene dioxygenase. Iron-sulfur protein, small subunit (todC2)                           |
| todD_at       | J04996.1   | P.putida toluene dioxygenase. Cis-toluene dihydrodiol dehydrogenase (todD)                         |
| tolres1_at    | AF362907.1 | Pseudomonas putida S12 isolate KL56H11 putative binding protein component of ABC sugar transporter |
| tolres10_at   | AF362898   | Pseudomonas putida S12 isolate KL55E10 toluene-induced genomic sequence                            |
| tolres11_at   | AF362897   | Pseudomonas putida S12 isolate KL53C11 toluene-induced genomic sequence                            |
| tolres12_at   | AF362896   | Pseudomonas putida S12 isolate KL46F6 toluene-induced genomic sequence                             |
| tolres12_s_at | AF362896   | Pseudomonas putida S12 isolate KL46F6 toluene-induced genomic sequence                             |
| tolres13_x_at | AF362895   | Pseudomonas putida S12 isolate KL36F12 toluene-induced genomic sequence                            |
| tolres14_at   | AF362894   | Pseudomonas putida S12 isolate KL40B6 toluene-induced genomic sequence                             |
| tolres14_s_at | AF362894   | Pseudomonas putida S12 isolate KL40B6 toluene-induced genomic sequence                             |
| tolres15_at   | AF362893   | Pseudomonas putida S12 isolate KL50B8 toluene-induced genomic sequence                             |
| tolres16_at   | AF362892   | Pseudomonas putida S12 isolate KL63F10 toluene-induced genomic sequence                            |
| tolres16_s_at | AF362892   | Pseudomonas putida S12 isolate KL63F10 toluene-induced genomic sequence                            |
| tolres17_at   | AF362891   | Pseudomonas putida S12 isolate KL63A12 toluene-induced genomic sequence                            |
| tolres17_s_at | AF362891   | Pseudomonas putida S12 isolate KL63A12 toluene-induced genomic sequence                            |
| tolres18_at   | AF362890   | Pseudomonas putida S12 isolate KL55D3 toluene-induced genomic sequence                             |
| tolres19_at   | AF362889   | Pseudomonas putida S12 isolate KL54C2 toluene-induced genomic sequence                             |
| tolres2_at    | AF362906   | Pseudomonas putida S12 isolate KL45C10 toluene-induced genomic sequence                            |
| tolres20_at   | AF362888   | Pseudomonas putida S12 isolate KL53G2 toluene-induced genomic sequence                             |
| tolres20_x_at | AF362888   | Pseudomonas putida S12 isolate KL53G2 toluene-induced genomic sequence                             |
| tolres21_at   | AF361469   | Pseudomonas putida S12 isolate KL65B9 toluene-induced genomic sequence                             |
| tolres21_s_at | AF361469   | Pseudomonas putida S12 isolate KL65B9 toluene-induced genomic sequence                             |

|               |            |                                                                                                       |
|---------------|------------|-------------------------------------------------------------------------------------------------------|
| tolres22_at   | AF361468   | Pseudomonas putida S12 isolate KL31F11 toluene-induced genomic sequence                               |
| tolres22_s_at | AF361468   | Pseudomonas putida S12 isolate KL31F11 toluene-induced genomic sequence                               |
| tolres22_x_at | AF361468   | Pseudomonas putida S12 isolate KL31F11 toluene-induced genomic sequence                               |
| tolres3_at    | AF362905   | Pseudomonas putida S12 isolate KL49B5 toluene-induced genomic sequence                                |
| tolres3_s_at  | AF362905   | Pseudomonas putida S12 isolate KL49B5 toluene-induced genomic sequence                                |
| tolres4_s_at  | AF362904   | Pseudomonas putida S12 isolate KL54C6 toluene-induced genomic sequence                                |
| tolres5_s_at  | AF362903   | Pseudomonas putida S12 isolate KL52B10 toluene-induced genomic sequence                               |
| tolres6_at    | AF362902   | Pseudomonas putida S12 isolate KL50F9 toluene-induced genomic sequence                                |
| tolres6_s_at  | AF362902   | Pseudomonas putida S12 isolate KL50F9 toluene-induced genomic sequence                                |
| tolres6_x_at  | AF362902   | Pseudomonas putida S12 isolate KL50F9 toluene-induced genomic sequence                                |
| tolres7_at    | AF362901   | Pseudomonas putida S12 isolate KL59A10 toluene-induced genomic sequence                               |
| tolres7_s_at  | AF362901   | Pseudomonas putida S12 isolate KL59A10 toluene-induced genomic sequence                               |
| tolres7_x_at  | AF362901   | Pseudomonas putida S12 isolate KL59A10 toluene-induced genomic sequence                               |
| tolres8_at    | AF362900   | Pseudomonas putida S12 isolate KL63E6 toluene-induced genomic sequence                                |
| tolres9_at    | AF362899   | Pseudomonas putida S12 isolate KL60D3 toluene-induced genomic sequence                                |
| tolres9_x_at  | AF362899   | Pseudomonas putida S12 isolate KL60D3 toluene-induced genomic sequence                                |
| tpl_at        | U25347     | Pantoea agglomerans tyrosine phenol-lyase (tpl) genes, complete cds                                   |
| trpA_at       | AF360362.1 | Pseudomonas putida S12 isolate KL55D8. Toluene exclusion pump membrane transport protein (trpA)       |
| trpA_s_at     | AF360362.1 | Pseudomonas putida S12 isolate KL55D8. Toluene exclusion pump membrane transport protein (trpA)       |
| trpB_s_at     | AF360362.1 | Pseudomonas putida S12 isolate KL55D8. Toluene exclusion pump periplasmic transport protein (trpB)    |
| trpC_at       | AF360362.1 | Pseudomonas putida S12 isolate KL55D8. Toluene exclusion pump outer membrane transport protein (trpC) |
| trpC_s_at     | AF360362.1 | Pseudomonas putida S12 isolate KL55D8. Toluene exclusion pump outer membrane transport protein (trpC) |
| trpR_at       | AF360362.1 | Pseudomonas putida S12 isolate KL55D8. Toluene exclusion pump regulator (trpR)                        |
| xylA_s_at     | NC_003350  | Pseudomonas putida plasmid pWW0, complete sequence                                                    |
| xylB_s_at     | NC_003350  | Pseudomonas putida plasmid pWW0, complete sequence                                                    |
| xylC_s_at     | NC_003350  | Pseudomonas putida plasmid pWW0, complete sequence                                                    |

|           |           |                                                    |
|-----------|-----------|----------------------------------------------------|
| xylE_s_at | NC_003350 | Pseudomonas putida plasmid pWW0, complete sequence |
| xylF_s_at | NC_003350 | Pseudomonas putida plasmid pWW0, complete sequence |
| xylG_s_at | NC_003350 | Pseudomonas putida plasmid pWW0, complete sequence |
| xylH_s_at | NC_003350 | Pseudomonas putida plasmid pWW0, complete sequence |
| xylI_s_at | NC_003350 | Pseudomonas putida plasmid pWW0, complete sequence |
| xylJ_s_at | NC_003350 | Pseudomonas putida plasmid pWW0, complete sequence |
| xylK_s_at | NC_003350 | Pseudomonas putida plasmid pWW0, complete sequence |
| xylL_s_at | NC_003350 | Pseudomonas putida plasmid pWW0, complete sequence |
| xylM_s_at | NC_003350 | Pseudomonas putida plasmid pWW0, complete sequence |
| xylN_s_at | NC_003350 | Pseudomonas putida plasmid pWW0, complete sequence |
| xylQ_s_at | NC_003350 | Pseudomonas putida plasmid pWW0, complete sequence |
| xylR_s_at | NC_003350 | Pseudomonas putida plasmid pWW0, complete sequence |
| xylS_s_at | NC_003350 | Pseudomonas putida plasmid pWW0, complete sequence |
| xylT_s_at | NC_003350 | Pseudomonas putida plasmid pWW0, complete sequence |
| xylU_s_at | NC_003350 | Pseudomonas putida plasmid pWW0, complete sequence |
| xylW_s_at | NC_003350 | Pseudomonas putida plasmid pWW0, complete sequence |
| xylX_s_at | NC_003350 | Pseudomonas putida plasmid pWW0, complete sequence |
| xylY_s_at | NC_003350 | Pseudomonas putida plasmid pWW0, complete sequence |
| xylZ_s_at | NC_003350 | Pseudomonas putida plasmid pWW0, complete sequence |

Table 2: Primers used for construction of gene disruption plasmids and nucleotide sequence analysis.

| Name                                    | Sequence <sup>a</sup>                 | Template                |
|-----------------------------------------|---------------------------------------|-------------------------|
| <b>Gene disruption plasmid primers:</b> |                                       |                         |
| JW5                                     | GCGTCTAGACTCAGGTCGAGGTGGCCCGG         | <i>tetA</i>             |
| JW6                                     | GCGTCTAGAGAATTCTCATGTTTGACAGCTTATC    | <i>tetA</i>             |
| NW13f                                   | CAGCGGCCGCATGTTCGAAAATCATGCACGCG      | PP3433 ( <i>hpd</i> )   |
| NW14r                                   | GCGGATCCCAGGGCACCCAGTATCAGCAG         | PP3433 ( <i>hpd</i> )   |
| NW4r                                    | GCTCTAGAAGTTGAAGTCGATGTCGTAGATAG      | PP3433 ( <i>hpd</i> )   |
| NW5f                                    | GCTCTAGACCTACTGGGCCGGGTTCTA           | PP3433 ( <i>hpd</i> )   |
| JW155                                   | GCGCGGCCGCATGAAAACCTCAGGTTGCAATTATTGG | PP3537 ( <i>pobA</i> )  |
| JW156                                   | GCGTCTAGACTGTTTCAGCACGCCCTCCGGG       | PP3537 ( <i>pobA</i> )  |
| JW157                                   | GCGTCTAGACGCCAGTCAATCACGAGTTGATC      | PP3537 ( <i>pobA</i> )  |
| JW158                                   | GGGCTCGAGTCAGGCAACTTCCTCGAACGGC       | PP3537 ( <i>pobA</i> )  |
| MW27                                    | GCGGGATCCATGAGTGGACAAAACATGCATTCAG    | pp4495 ( <i>aroP1</i> ) |
| MW28                                    | GCGTCTAGAACGGTCTTTGGCTTGTCGGCC        | pp4495 ( <i>aroP1</i> ) |
| MW29                                    | GCGTCTAGAATCAACCAGGTCATCTACCGTATC     | pp4495 ( <i>aroP1</i> ) |
| MW30                                    | GCGGCGGCCGCTTACTTGGCCACAGTCTCAACAGC   | pp4495 ( <i>aroP1</i> ) |
| 4489.1F                                 | GCGGGATCCGCGGGCTCATCTCCCCTACCCC       | PP4490 ( <i>phhA</i> )  |
| 4490.1R                                 | GCGCAATTGGGTGAGGGCTTTTCTTGTTATGTGC    | PP4490 ( <i>phhA</i> )  |
| 4490.2F                                 | GCGCAATTGGTGAACACCCTGATCACCCGCC       | PP4490 ( <i>phhA</i> )  |
| 4491.1R                                 | GCGGCGGCCGCTTCCGGCCTTCAGCCGTTTCCG     | PP4490 ( <i>phhA</i> )  |
| <b>Nucleotide sequencing primers:</b>   |                                       |                         |
| SP7                                     | ATGAGCATCCGCCGACC                     | PP1362 ( <i>pykA</i> )  |
| SP8                                     | TCAACCGACCAGCGGATCAC                  | PP1362 ( <i>pykA</i> )  |

|         |                           |                          |
|---------|---------------------------|--------------------------|
| SP9     | ATGAACCAACCGTGGAGCCC      | PP1866                   |
| SP10    | TTAGCGCCGTACCTGCTTGA      | PP1866                   |
| SP11    | TTGGCGGCCGGCACCC          | PP2324 ( <i>aroF-1</i> ) |
| SP12    | TCAGCCGCGCTTACGCTG        | PP2324 ( <i>aroF-1</i> ) |
| SP13    | ATGCACGCTTCCAGCCTCG       | PP3080 ( <i>aroF-2</i> ) |
| SP14    | CTACAGTTTTTTGTGCCGCCTC    | PP3080 ( <i>aroF-2</i> ) |
| SP15    | ATGAGCCAGCAAGCCATCCT      | PP0074 ( <i>aroE-1</i> ) |
| SP16    | TCAGGTGAAACTGGCAAAGTGC    | PP0074 ( <i>aroE-1</i> ) |
| SP17    | ATGAGCGACCGCTACGCAG       | PP3002 ( <i>aroE-2</i> ) |
| SP18    | CTACTCCAAGGGAATCGTCAG     | PP3002 ( <i>aroE-2</i> ) |
| SP19    | ATGAACCGCGAAGAATTCCTGC    | PP0417 ( <i>trpE</i> )   |
| SP20    | TTATCTGGCGGAAGTCTGCTC     | PP0417 ( <i>trpE</i> )   |
| SP23    | ATGGCTGACATGTCCGAACAG     | PP1769 ( <i>pheA</i> )   |
| SP24    | TCAAAGCACCGCCTTCGGATAA    | PP1769 ( <i>pheA</i> )   |
| SP25    | ATGGCAACGATCAGAGCAAGG     | PP2170                   |
| SP26    | TCACGATGCTGAAGCCTCATC     | PP2170                   |
| NW7f    | TCGAGCAGATCAGCCAGGA       | PP1770                   |
| NW8r    | GAATGCCAGCAAGCGATACAG     | PP1770                   |
| SP29    | ATGAAACAGACGCAATACGTGGC   | PP4990 ( <i>phhA</i> )   |
| SP30    | TCAGGCAGCGACCTTGGGT       | PP4990 ( <i>phhA</i> )   |
| SP31    | ATGAGCCTGTTTTCCGCTGTC     | PP1972 ( <i>tyrB-1</i> ) |
| SP32    | TTACAGCACTTCCACGATCGCTT   | PP1972 ( <i>tyrB-1</i> ) |
| SP33    | GTGTTCAAACATGTTCGATGCCTAT | PP3590 ( <i>tyrB-2</i> ) |
| SP34    | TTACTTCTGAACGGCAGCGAAC    | PP3590 ( <i>tyrB-2</i> ) |
| SP35    | ATGAACCGCGACACGTCGC       | PP4621 ( <i>hmgA</i> )   |
| SP36    | TTATCTCCGGTTCGGGTTGAAG    | PP4621 ( <i>hmgA</i> )   |
| tpl(f)1 | GCAGACCACCGACATCCT        | <i>tpl</i>               |
| tpl(f)2 | AAGACCACCGAGATTCAAG       | <i>tpl</i>               |
| tpl(f)3 | GTGGGCAGCCTGTTTCAATG      | <i>tpl</i>               |
| tpl(r)4 | GAAAGGCTCGGCAGGATAG       | <i>tpl</i>               |
| tpl(r)5 | AAGCCGCCGATATTCACCAGA     | <i>tpl</i>               |
| tpl(r)6 | CTCGCCCTGGTGAGACAT        | <i>tpl</i>               |

**RT-qPCR primers:**

|             |                        |                        |
|-------------|------------------------|------------------------|
| PP1376F1    | ATCTTCTCTGGCACCTATGG   | PP1376 ( <i>pcaK</i> ) |
| PP1376R1    | AGGAGGTAGACGATCACCAG   | PP1376 ( <i>pcaK</i> ) |
| PP1377F1    | ATGAAGAGCCAGTACGGTGT   | PP1377 ( <i>pcaF</i> ) |
| PP1377R1    | CACGCGAAACCTGATAGTC    | PP1377 ( <i>pcaF</i> ) |
| PP1380F2    | CGGTACGTGACGCTGATTAT   | PP1380 ( <i>pcaD</i> ) |
| PP1380R2    | GTA CT CGGCACCTTGGATAC | PP1380 ( <i>pcaD</i> ) |
| PS122406 F1 | CGGGCTGAACATTACTTACC   | PP2406                 |
| PS122406 R1 | AGCACCACGGTGTTTACC     | PP2406                 |
| PP2407F1    | CCCTTATTCTCGTGCTCAAC   | PP2407                 |

|          |                      |                        |
|----------|----------------------|------------------------|
| PP2407R1 | ATCCAGTCGATCAGTTCACC | PP2407                 |
| PP2554F1 | CTCAGTGAGCTGGCGTACTA | PP2554                 |
| PP2554R2 | GCTGGATGATCTCGAAGAAG | PP2554                 |
| PP2608F1 | GAGGTTCCACTGAACTGGTC | PP2608                 |
| PP2608R2 | GGTATCCGCAAAGCTGTC   | PP2608                 |
| PP2826F1 | CGGGTCAACTACTTGCTGAT | PP2826                 |
| PP2826R1 | AGAAGTCATCCAGGGTGATG | PP2826                 |
| PP3537F1 | CTCCGACGTCAACTACCTGT | PP3537 ( <i>pobA</i> ) |
| PP3537R1 | GTCAGCTTCCTGCATCTTCT | PP3537 ( <i>pobA</i> ) |
| PP3951F1 | AGTCCGACTCCTACGTGTTC | PP3951 ( <i>pcaI</i> ) |
| PP3951R1 | CATCGATCTCACGGGTTT   | PP3951 ( <i>pcaI</i> ) |
| PP4656F1 | CCCTTACGCCTGACTACAAG | PP4656 ( <i>pcaH</i> ) |
| PP4656R1 | GAAGTTCAGCAGCAGGTCAT | PP4656 ( <i>pcaH</i> ) |

---

a: Underlined sequences indicate a restriction site that was added to the primer.
